# Supplementary material for: Association of Body Mass Index with the Tuberculosis Infection: a Population-based Study among 17796 Adults in Rural China
Source: PubMed Central journal article supplement (PMC5296872; doi:10.1038/srep41933), 2017-02-08
Supplement: srep41933-s1.pdf [file srep41933-s1.pdf]

**Association of Body Mass Index with the Tuberculosis Infection: a Population-based Study among 17796 Adults in Rural China**

Haoran Zhang<sup>1</sup>, Xiangwei Li<sup>1</sup>, Henan Xin<sup>1</sup>, Hengjing Li<sup>1</sup>, Mufei Li<sup>1</sup>, Wei Lu<sup>2</sup>,  
Liqiong Bai<sup>3</sup>, Xinhua Wang<sup>4</sup>, Jianmin Liu<sup>5</sup>, Qi Jin<sup>1\*</sup> & Lei Gao<sup>1\*</sup>

<sup>1</sup>MOH Key Laboratory of Systems Biology of Pathogens, Institute of Pathogen Biology, and Centre for Tuberculosis, Chinese Academy of Medical Sciences and Peking Union Medical College, Beijing, China, 100730

<sup>2</sup>Jiangsu Provincial Center for Diseases Control and Prevention, Nanjing, China, 210009

<sup>3</sup>Hunan Provincial Institute of Tuberculosis Prevention and Control, Changsha, China, 410006

<sup>4</sup>Gansu Provincial Center for Diseases Control and Prevention, Lanzhou, China, 730000

<sup>5</sup>The Sixth People's Hospital of Zhengzhou, Zhengzhou, China, 450061

**\*Correspondence:** Prof. Lei Gao and Prof. Qi Jin, MOH Key Laboratory of Systems Biology of Pathogens, Institute of Pathogen Biology, and Centre for Tuberculosis, Chinese Academy of Medical Sciences and Peking Union Medical College, Beijing, China, 100730. Email: [gaolei@ipbcams.ac.cn](mailto:gaolei@ipbcams.ac.cn) (GL), [jinqi@ipbcams.ac.cn](mailto:jinqi@ipbcams.ac.cn) (JQ). Telephone: 8610-67828550, fax numbers: 8610-67828550.

**Table S1. Distribution of BMI (kg/m<sup>2</sup>) by age (years) and gender**

|           | Total |       | 18-29 years |       | 30-39 years |       | 40-49 years |       | 50-59 years |       | 60-69 years |       | ≥70 years |       | p-value |  |
|-----------|-------|-------|-------------|-------|-------------|-------|-------------|-------|-------------|-------|-------------|-------|-----------|-------|---------|--|
|           | N     | %     | n           | %     | n           | %     | n           | %     | n           | %     | n           | %     | n         | %     |         |  |
| Total     |       |       |             |       |             |       |             |       |             |       |             |       |           |       |         |  |
| <18.5     | 927   | 5.21  | 280         | 11.71 | 90          | 4.12  | 118         | 2.54  | 101         | 2.80  | 158         | 5.04  | 180       | 9.88  | <0.0001 |  |
| 18.5-24.0 | 9362  | 52.61 | 1483        | 62.02 | 1182        | 54.17 | 2217        | 47.67 | 1762        | 48.77 | 1660        | 52.93 | 1058      | 58.07 |         |  |
| 24.0-28.0 | 5496  | 30.89 | 417         | 17.44 | 648         | 29.70 | 1694        | 36.42 | 1316        | 36.42 | 990         | 31.57 | 431       | 23.66 |         |  |
| ≥28.0     | 2010  | 11.30 | 211         | 8.82  | 262         | 12.01 | 622         | 13.37 | 434         | 12.01 | 328         | 10.46 | 153       | 8.40  |         |  |
| Male      |       |       |             |       |             |       |             |       |             |       |             |       |           |       |         |  |
| <18.5     | 416   | 5.20  | 127         | 11.60 | 27          | 2.93  | 45          | 2.28  | 50          | 3.03  | 75          | 4.92  | 92        | 10.97 | <0.0001 |  |
| 18.5-24.0 | 4256  | 53.18 | 599         | 54.70 | 432         | 46.80 | 942         | 47.77 | 885         | 53.67 | 878         | 57.57 | 520       | 61.98 |         |  |
| 24.0-28.0 | 2470  | 30.86 | 232         | 21.19 | 321         | 34.78 | 727         | 36.87 | 558         | 33.84 | 456         | 29.90 | 176       | 20.98 |         |  |
| ≥28.0     | 861   | 10.76 | 137         | 12.51 | 143         | 15.49 | 258         | 13.08 | 156         | 9.46  | 116         | 7.61  | 51        | 6.08  |         |  |
| Female    |       |       |             |       |             |       |             |       |             |       |             |       |           |       |         |  |
| <18.5     | 511   | 5.22  | 153         | 11.81 | 63          | 5.00  | 73          | 2.72  | 51          | 2.60  | 83          | 5.15  | 88        | 8.95  | <0.0001 |  |
| 18.5-24.0 | 5106  | 52.14 | 884         | 68.21 | 750         | 59.57 | 1275        | 47.59 | 877         | 44.65 | 782         | 48.54 | 538       | 54.73 |         |  |
| 24.0-28.0 | 3026  | 30.90 | 185         | 14.27 | 327         | 25.97 | 967         | 36.10 | 758         | 38.59 | 534         | 33.15 | 255       | 25.94 |         |  |
| ≥28.0     | 1149  | 11.73 | 74          | 5.71  | 119         | 9.45  | 364         | 13.59 | 278         | 14.15 | 212         | 13.16 | 102       | 10.38 |         |  |

Abbreviation: BMI=body mass index.

**Table S2. Distribution of BMI (kg/m<sup>2</sup>) by study site and gender**

|               | Site A<br>n (%) | Site B<br>n (%) | Site C<br>n (%) | Site D<br>n (%) |
|---------------|-----------------|-----------------|-----------------|-----------------|
| <b>Total</b>  |                 |                 |                 |                 |
| N*            | 5014            | 4141            | 4212            | 3896            |
| <18.5         | 217(4.33)       | 126(3.04)       | 278(6.60)       | 286(7.34)       |
| 18.5-24.0     | 2755(54.95)     | 1804(43.56)     | 2281(54.15)     | 2206(56.62)     |
| 24.0-28.0     | 1609(32.09)     | 1384(33.42)     | 1236(29.34)     | 1121(28.77)     |
| ≥28.0         | 433(8.64)       | 827(19.97)      | 417(9.90)       | 283(7.26)       |
| <b>Male</b>   |                 |                 |                 |                 |
| N             | 2303            | 2069            | 1933            | 1544            |
| <18.5         | 86(3.73)        | 57(2.75)        | 134 (6.93)      | 132(8.55)       |
| 18.5-24.0     | 1265(54.93)     | 944(45.63)      | 1088(56.29)     | 862(55.83)      |
| 24.0-28.0     | 765(33.22)      | 691(33.40)      | 539(27.88)      | 439(28.43)      |
| ≥28.0         | 187(8.12)       | 377(18.22)      | 172(8.90)       | 111(7.19)       |
| <b>Female</b> |                 |                 |                 |                 |
| N             | 2711            | 2072            | 2279            | 2352            |
| <18.5         | 131(4.83)       | 69(3.33)        | 144 (6.32)      | 154(6.55)       |
| 18.5-24.0     | 1490(54.96)     | 860(41.51)      | 1193 (52.35)    | 1344(57.14)     |
| 24.0-28.0     | 844(31.13)      | 693(33.45)      | 697(30.58)      | 682(29.00)      |
| ≥28.0         | 246(9.07)       | 450(21.72)      | 245(10.75)      | 172(7.31)       |

Abbreviations: BMI=body mass index.

\*Sum might not always be in total because of missing data. Frequency of missing data did not differ significantly between sites.

**Table S3. Distribution of T2DM by BMI (kg/m<sup>2</sup>) categories**

| T2DM | Total        | <18.5 kg/m <sup>2</sup> | 18.5-24.0 kg/m <sup>2</sup> | 24.0-28.0 kg/m <sup>2</sup> | ≥28.0kg/m <sup>2</sup> | p for $\chi^2$ test |
|------|--------------|-------------------------|-----------------------------|-----------------------------|------------------------|---------------------|
| No   | 16396(94.97) | 887(5.41)               | 8745(53.34)                 | 5005(30.53)                 | 1759(10.73)            | <0.0001             |
| Yes  | 868(5.03)    | 21(2.42)                | 301(34.68)                  | 345(39.75)                  | 201(23.16)             |                     |

Abbreviations: BMI=body mass index. T2DM=type 2 diabetes mellitus.

Data are n (%).
